# Supplementary material
Source: PubMed Central journal article supplement (PMC6328028)
Supplement: jciinsight-3-124850-s079.pdf [file jciinsight-3-124850-s079.pdf]

## Supplementary data

### Coding nucleotide sequence of F8-VEGF-C

GAGGTGCAGCTGTTGGAGTCTGGGGGAGGCTTGGTACAGCCTGGGGGGTCCCTGAGA  
CTCTCCTGTGCAGCCTCTGGATTCACCTTTAGCCTGTTTACGATGAGCTGGGTCCGCC  
AGGCTCCAGGGAAGGGGCTGGAGTGGGTCTCAGCTATTAGTGGTAGTGGTGGTAGCA  
CATACTACGCAGACTCCGTGAAGGGCCGGTTCACCATCTCCAGAGACAATTCCAAGA  
ACACGCTGTATCTGCAAATGAACAGCCTGAGAGCCGAGGACACGGCCGTATATTACT  
GTGCGAAAAGTACTCATTGTATCTTTTTGACTACTGGGGCCAGGGAACCCTGGTCA  
CCGTCTCGAGTGGCGGTAGCGGAGGGGAAATTGTGTTGACGCAGTCTCCAGGCACCC  
TGTCTTTGTCTCCAGGGGAAAGAGCCACCCTCTCCTGCAGGGCCAGTCAGAGTGTTAG  
CATGCCGTTTTTAGCCTGGTACCAGCAGAAACCTGGCCAGGCTCCCAGGCTCCTCATC  
TATGGTGCATCCAGCAGGGCCACTGGCATCCCAGACAGGTTTCAGTGGCAGTGGGTCT  
GGGACAGACTTCACTCTCACCATCAGCAGACTGGAGCCTGAAGATTTTGCAGTGTAT  
TACTGTCAGCAGATGCGTGGTCCGCCGCCGACGTTCCGGCCAAGGGACCAAGGTGGAA  
ATCAAATCTTCCTCATCGGGTAGTAGCTCTTCCGGCTCATCGTCCAGCGGCGCACATT  
ATAATACAGAGATCTTGAAAAGTATTGATAATGAGTGGAGAAAGACTCAATGCATGC  
CACGGGAGGTGTGTATAGATGTGGGGAAGGAGTTTGGAGTCGCGACAAACACCTTCT  
TTAAACCTCCATGTGTGTCCGTCTACAGATGTGGGGGTTGCTGCAATAGTGAGGGGC  
TGCAGTGCATGAACACCAGCAGGACTACCTCAGCAAGACGTTATTTGAAATTACAG  
TGCCTCTCTCAAGGCCCAAACCAGTAACAATCAGTTTTGCCAATCACACTTCCTG  
CCGATGCATGTCTAAACTGGATGTTTACAGACAAGTTCATTCCATTATTAGACGT

### Coding nucleotide sequence of F8-VEGF-C156Ser

GAGGTGCAGCTGTTGGAGTCTGGGGGAGGCTTGGTACAGCCTGGGGGGTCCCTGAGA  
CTCTCCTGTGCAGCCTCTGGATTCACCTTTAGCCTGTTTACGATGAGCTGGGTCCGCC  
AGGCTCCAGGGAAGGGGCTGGAGTGGGTCTCAGCTATTAGTGGTAGTGGTGGTAGCA  
CATACTACGCAGACTCCGTGAAGGGCCGGTTCACCATCTCCAGAGACAATTCCAAGA  
ACACGCTGTATCTGCAAATGAACAGCCTGAGAGCCGAGGACACGGCCGTATATTACT  
GTGCGAAAAGTACTCATTGTATCTTTTTGACTACTGGGGCCAGGGAACCCTGGTCA  
CCGTCTCGAGTGGCGGTAGCGGAGGGGAAATTGTGTTGACGCAGTCTCCAGGCACCC  
TGTCTTTGTCTCCAGGGGAAAGAGCCACCCTCTCCTGCAGGGCCAGTCAGAGTGTTAG  
CATGCCGTTTTTAGCCTGGTACCAGCAGAAACCTGGCCAGGCTCCCAGGCTCCTCATC  
TATGGTGCATCCAGCAGGGCCACTGGCATCCCAGACAGGTTTCAGTGGCAGTGGGTCT  
GGGACAGACTTCACTCTCACCATCAGCAGACTGGAGCCTGAAGATTTTGCAGTGTAT  
TACTGTCAGCAGATGCGTGGTCCGCCGCCGACGTTCCGGCCAAGGGACCAAGGTGGAA  
ATCAAATCTTCCTCATCGGGTAGTAGCTCTTCCGGCTCATCGTCCAGCGGCGCACATT  
ATAATACAGAGATCTTGAAAAGTATTGATAATGAGTGGAGAAAGACTCAATGCATGC  
CACGGGAGGTGTGTATAGATGTGGGGAAGGAGTTTGGAGTCGCGACAAACACCTTCT  
TTAAACCTCCATCTGTGTCCGTCTACAGATGTGGGGGTTGCTGCAATAGTGAGGGGC  
TGCAGTGCATGAACACCAGCAGGACTACCTCAGCAAGACGTTATTTGAAATTACAG  
TGCCTCTCTCAAGGCCCAAACCAGTAACAATCAGTTTTGCCAATCACACTTCCTG  
CCGATGCATGTCTAAACTGGATGTTTACAGACAAGTTCATTCCATTATTAGACGT

### Coding nucleotide sequence of KSF-VEGF-C

GAGGTGCAGCTGTTGGAGTCTGGGGGAGGCTTGGTACAGCCTGGGGGGTCCCTGAGA  
CTCTCCTGTGCAGCCTCTGGATTCACCTTTAGCAGCTATGCCATGAGCTGGGTCCGCC  
AGGCTCCAGGGAAGGGGCTGGAGTGGGTCTCAGCTATTAGTGGTAGTGGTGGTAGCA

CATACTACGCAGACTCCGTGAAGGGCCGGTTCACCATCTCCAGAGACAATTCCAAGA  
ACACGCTGTATCTGCAAATGAACAGCCTGAGAGCCGAAGACACGGCCGTATATTACT  
GTGCGAAATCGCCTAAGGTGTCGCTTTTTGACTACTGGGGCCAGGGAACCTGGTCA  
CCGTCTCGAGTGGCGGTAGCGGAGGGTCTGAGCTGACTCAGGACCCTGCTGTGTCTGT  
GGCCTTGGGACAGACAGTCAGGATCACATGCCAAGGAGACAGTCTCAGAAGCTATTA  
TGCAAGCTGGTACCAGCAGAAGCCAGGACAGGCCCTGTACTTGTCATCTATGGTAA  
AAACAACCGGCCCTCAGGGATCCCAGACCGATTCTCTGGCTCCAGCTCAGGAAACACA  
GCTTCCTTGACCATCACTGGGGCTCAGGCGGAAGATGAGGCTGACTATTACTGTAAC  
TCCTCTCCCCTGAATCGGCTGGCTGTGGTATTCGGCGGAGGGACCAAGCTGACCGTCC  
TAGGCTCTTCCTCATCGGGTAGTAGCTTTCGGGCTCATCGTCCAGCGGCGCACATTA  
TAATACAGAGATCTTGAAAAGTATTGATAATGAGTGGAGAAAGACTCAATGCATGCC  
ACGGGAGGTGTGTATAGATGTGGGGAAGGAGTTTGGAGTCGCGACAAACACCTTCTT  
TAAACCTCCATGTGTGTCCGTCTACAGATGTGGGGGTTGCTGCAATAGTGAGGGGCT  
GCAGTGCATGAACACCAGCACGAGCTACCTCAGCAAGACGTTATTTGAAATTACAGT  
GCCTCTCTCTCAAGGCCCAAACCAGTAACAATCAGTTTTGCCAATCACACTTCCTGC  
CGATGCATGTCTAAACTGGATGTTTACAGACAAGTTCATTCCATTATTAGACGT

## Figure S1

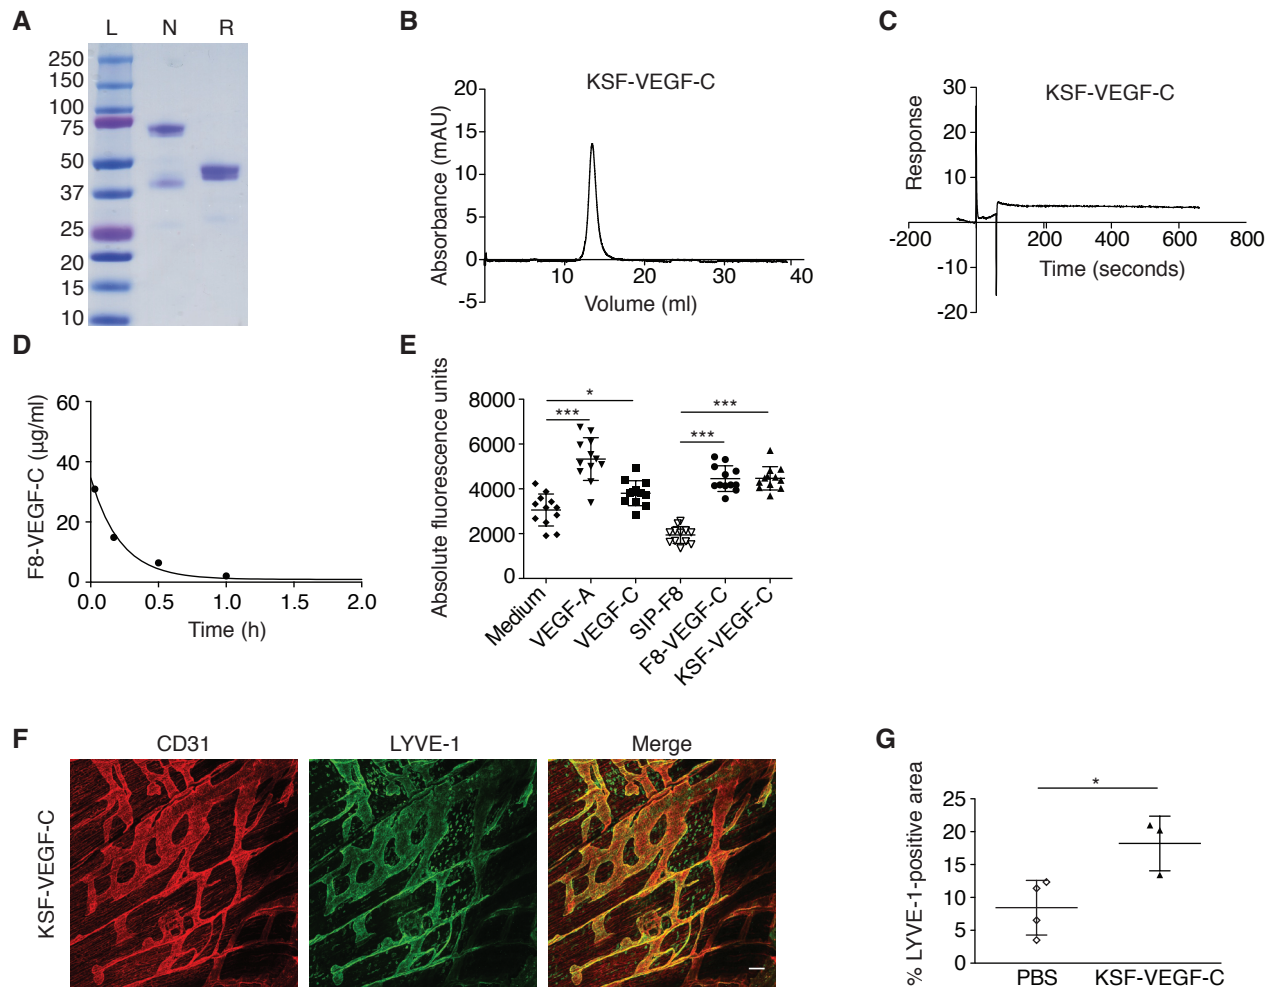

**Figure S1. KSF-VEGF-C is efficiently purified, does not bind EDA and is biologically active.** (A) SDS-PAGE analysis of KSF-VEGF-C. Lanes show size ladder (L), protein under non-reducing (N) or reducing (R) conditions. (B) Size-exclusion chromatogram of KSF-VEGF-C. (C) Surface plasmon resonance analysis of KSF-VEGF-C using an EDA-coated chip. (D) ELISA measurements of serum levels of F8-VEGF-C over time to calculate serum half-life. (E) Proliferation assay of human LECs after 72 hours of indicated treatment ( $n = 12$  wells per condition, one-way ANOVA with Bonferroni post-test, one out of three similar experiments shown). (F) Whole-mount immunofluorescence staining for CD31 (red) and LYVE-1 (green) on diaphragms of pups having received five injections of PBS or KSF-VEGF-C. Scale bar =  $100 \mu\text{m}$ . (G) Quantification of LYVE-1-positive area on stained diaphragm from pups ( $n = 3-4$  animals, two-tailed Student's t-test, one out of two similar experiments shown). Data represent mean  $\pm$  SD. \* $P < 0.05$ , \*\*\* $P < 0.001$ .

## Figure S2

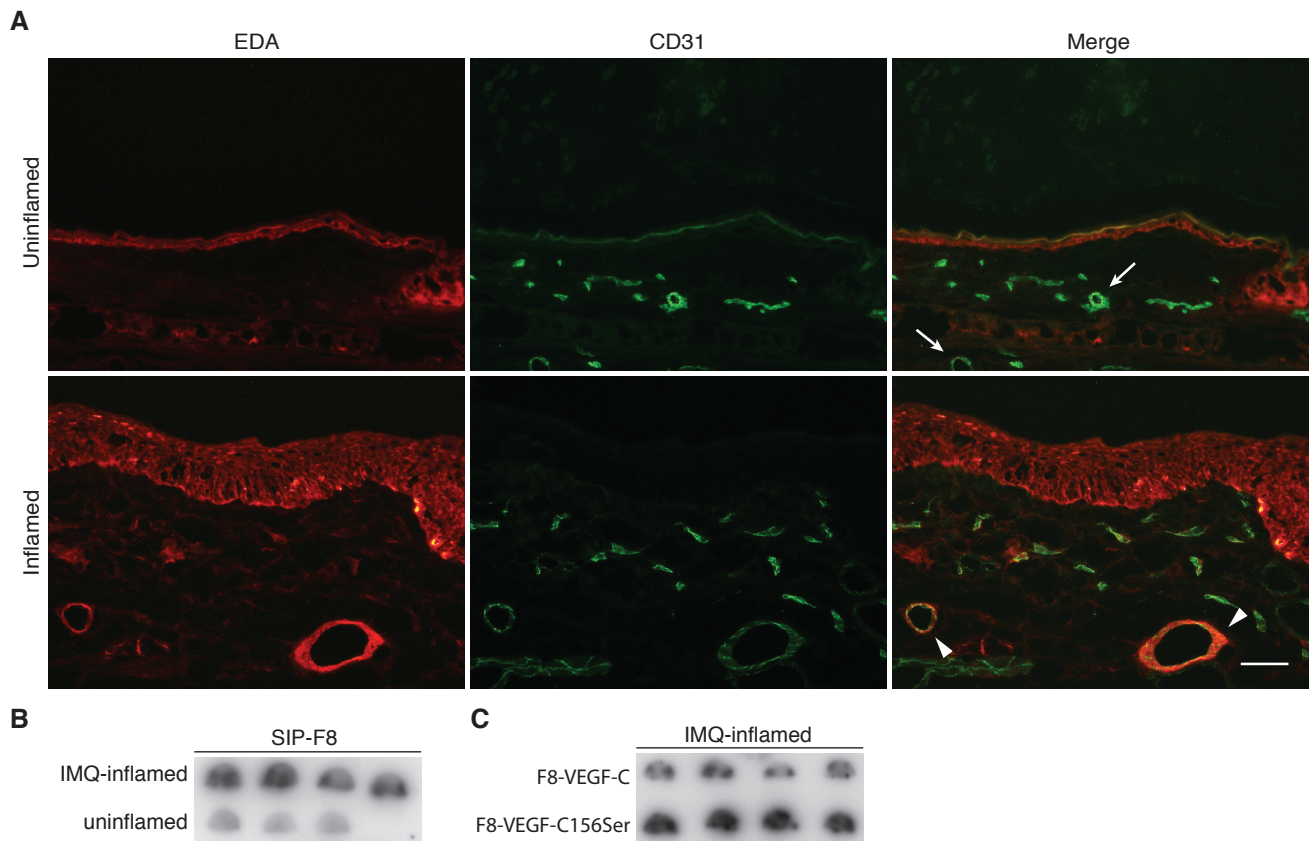

**Figure S2. EDA is expressed in imiquimod-treated but not healthy skin and F8 fusion proteins accumulate in inflamed ear skin.** (A) Immunofluorescence stainings for EDA (red) and CD31 (green) in uninfamed (top) and inflamed (bottom) ear skin of mice treated with imiquimod for seven days (except day six). Scale bar = 100  $\mu$ m. (B) Autoradiography of SIP-F8 in uninfamed and imiquimod-inflamed ears (n = 4 mice per group). (C) Autoradiography of F8-VEGF-C and F8-VEGF-C156Ser in inflamed ears (n = 4 mice per group). Arrows: EDA-negative vessels; arrowheads: EDA-positive vessels.

**Figure S3**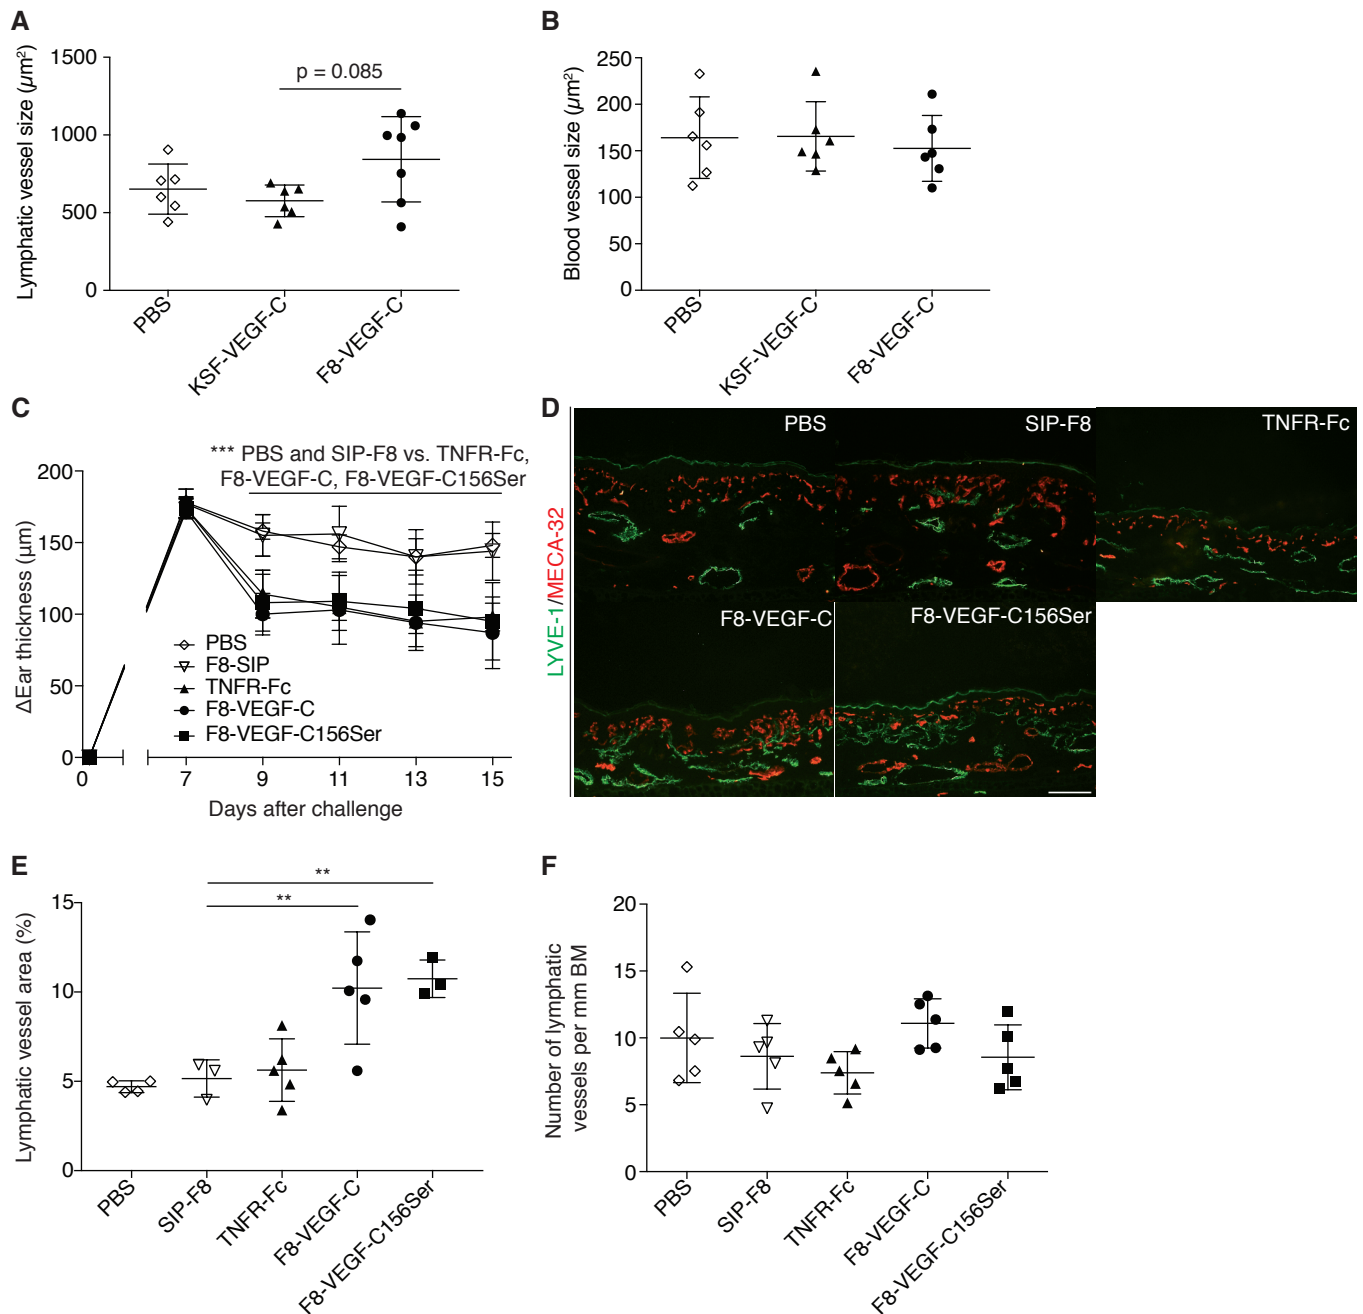

**Figure S3. F8-VEGF-C and F8-VEGF-C156Ser cause lymphatic expansion and alleviate ear inflammation in K14-VEGF-A mice to a degree comparable with TNFR-Fc.** (A) Size of lymphatic vessels in inflamed ears ( $n = 6-7$  animals per group, one-way ANOVA with Bonferroni post-test). (B) Size of blood vessels in inflamed ears ( $n = 6$  animals per group, one-way ANOVA with Bonferroni post-test). (C) Ear thickness represented as changes compared to ear thickness prior to challenge ( $n = 5$  animals per group, two-way ANOVA with Bonferroni post-test, one out of two similar experiments shown). (D) Immunofluorescence images of ears from mice that received the indicated treatment stained for LYVE-1 (green), MECA-32 (red). Scale bar =  $100 \mu\text{m}$ . (E) Quantification of lymphatic vessel area (expressed as percent of analyzed area,  $n = 3-5$  animals per group, one-way ANOVA with Bonferroni post-test, one out of two similar experiments shown). (F) Number of lymphatic vessels in inflamed ears (normalized to basement membrane,  $n = 5$  animals per group, one-way ANOVA with Bonferroni post-test). Data represent mean  $\pm$  SD. \*\* $P < 0.01$ , \*\*\* $P < 0.001$ .

**Figure S4**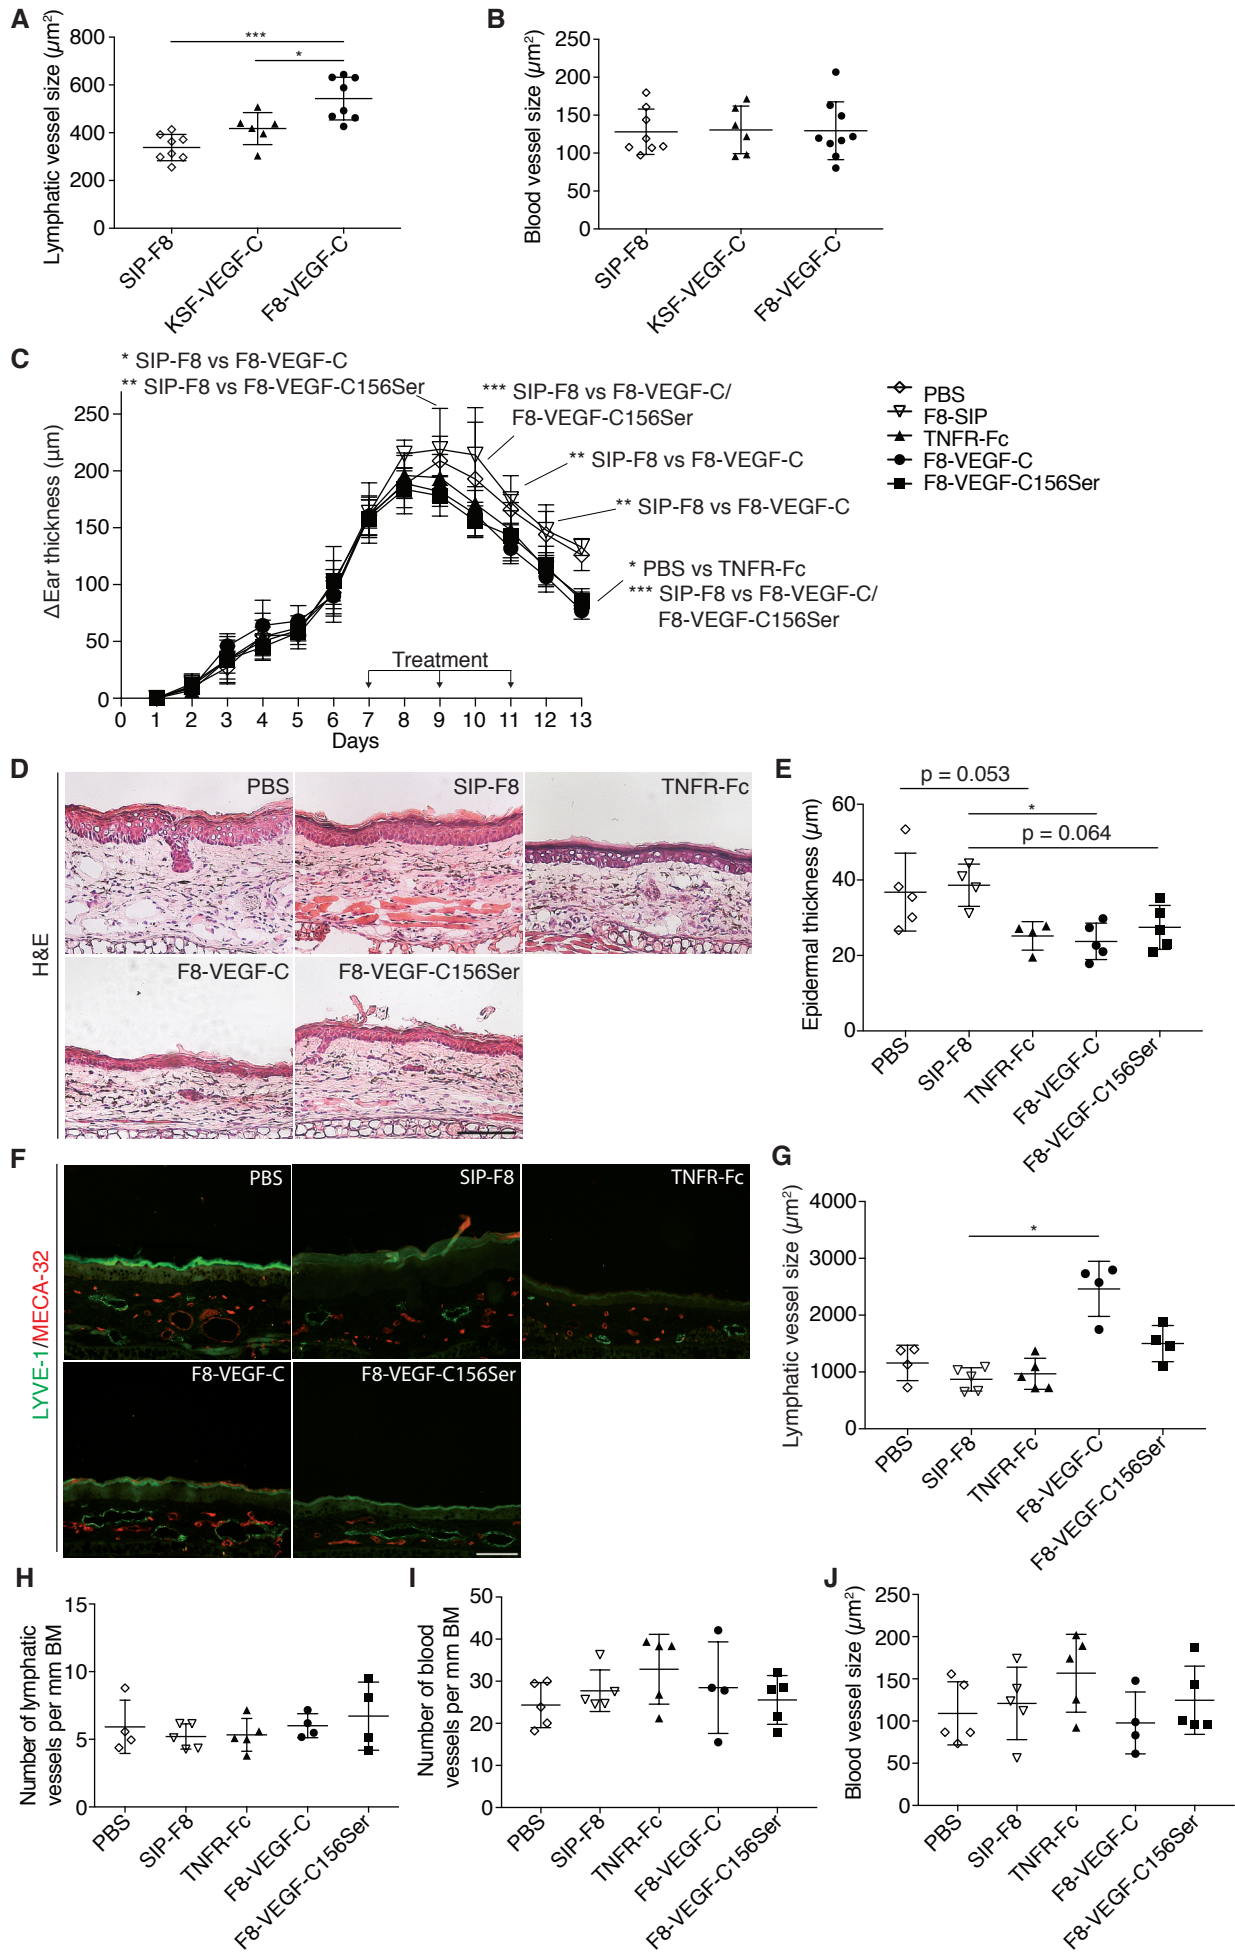

**Figure S4. F8-VEGF-C and F8-VEGF-C156Ser cause lymphatic expansion and accelerate edema resolution in imiquimod-inflamed mice to a degree comparable with TNFR-Fc. (A)** Size of lymphatic vessels in inflamed ears (n = 6-8 animals per group, one-way ANOVA with Bonferroni post-test). **(B)** Size of blood vessels in inflamed ears (n = 6-9 animals per group, one-way ANOVA with Bonferroni post-test). **(C)** Ear thickness represented as change compared to ear thickness on day 1 (n = 5 animals per group, two-way ANOVA with Bonferroni post-test). **(D)** Hematoxylin and eosin-stained ears of mice having received the indicated treatment. Scale bar = 100  $\mu$ m. **(E)** Quantification of epidermal thickness on hematoxylin and eosin-stained ear sections (n = 4-5 mice per group, one-way ANOVA with Bonferroni post-test). **(F)** Immunofluorescence images of ears from mice that received the indicated treatment stained for LYVE-1 (green) and MECA-32 (red). Scale bar = 100  $\mu$ m. **(G)** Quantification of lymphatic vessel size (n = 4-5 animals per group, one-way ANOVA with Bonferroni post-test). **(H)** Number of lymphatic vessels in inflamed ears (normalized to basement membrane length, n = 4-5 animals per group, one-way ANOVA with Bonferroni post-test). **(I)** Number of blood vessels in inflamed ears (normalized to basement membrane, n = 4-5 animals per group, one-way ANOVA with Bonferroni post-test). **(J)** Blood vessel size as quantified in inflamed ears (normalized to basement membrane, n = 4-5 animals per group, one-way ANOVA with Bonferroni post-test). Data represent mean  $\pm$  SD. \*P < 0.05, \*\*P < 0.01, \*\*\*P < 0.001.

**Figure S5**

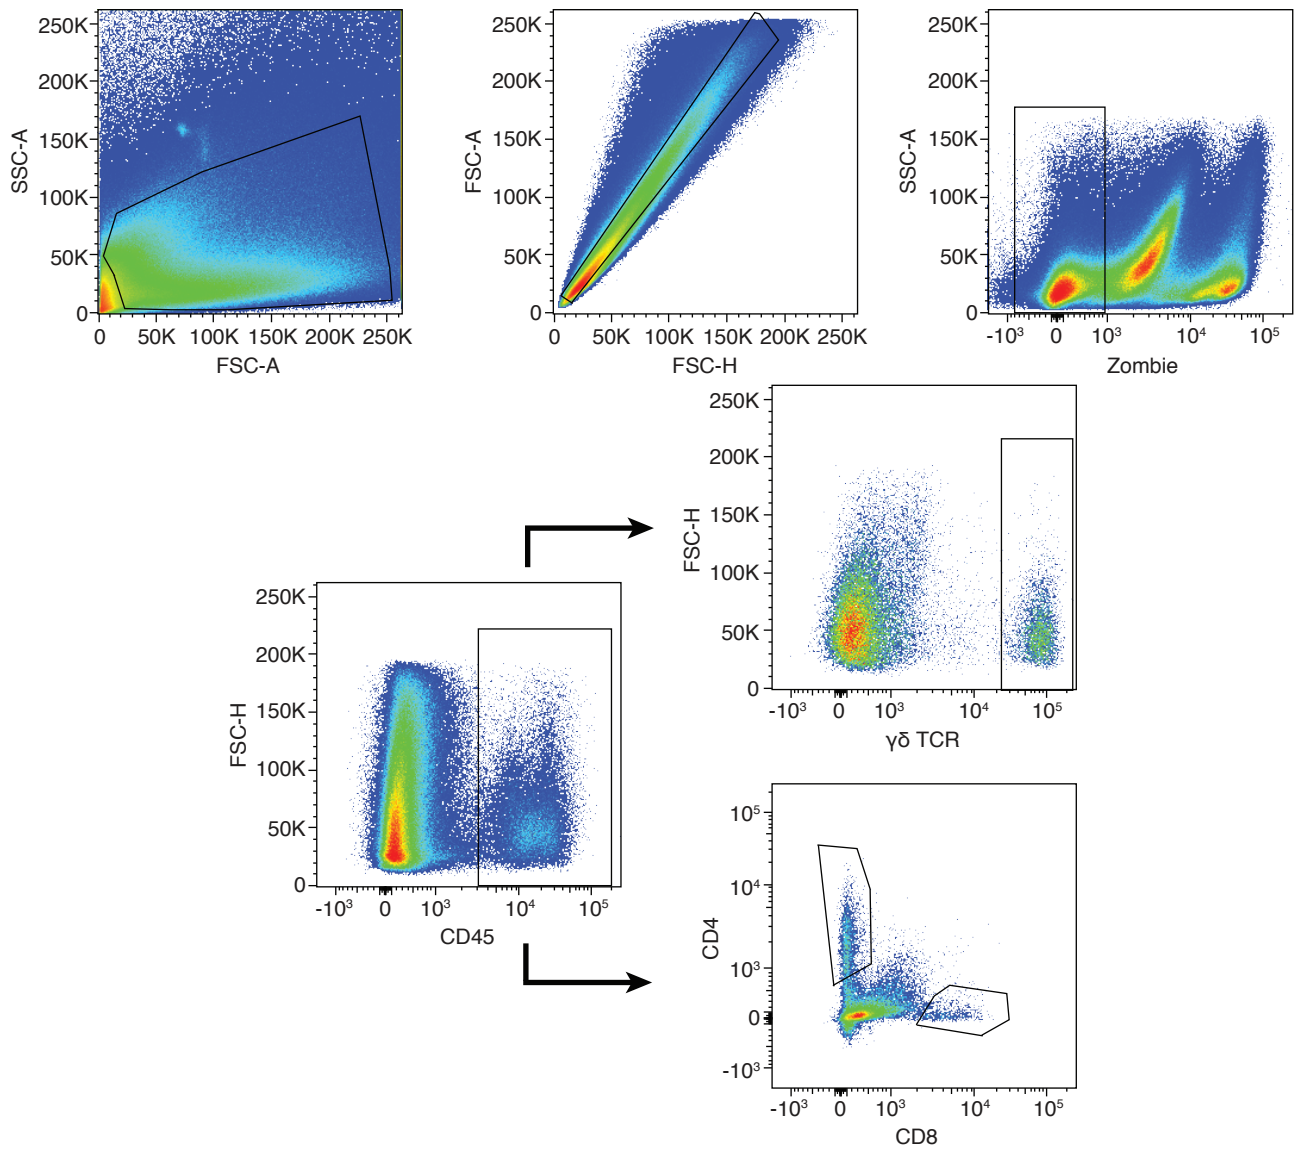

**Figure S5. Gating strategy for analysis of T cell subsets.** Ears of K14-VEGF-A mice at day 15 after challenge were harvested and digested. Stained single cell suspensions were recorded and gated for cells and single cells. Alive single cells were selected for CD45-positivity. CD45<sup>+</sup> cells were analyzed with regards to  $\gamma\delta$  TCR and CD4 as well as CD8 expression. Gates were set based on isotype controls (except for CD45).
